# Supplementary material for: Interferon‐beta signaling in retinal mononuclear phagocytes attenuates pathological neovascularization
Source: EMBO Mol Med. 2016 May 3;8(6):670–8. doi: 10.15252/emmm.201505994 (PMC4888856; doi:10.15252/emmm.201505994)

## Expanded View Figures

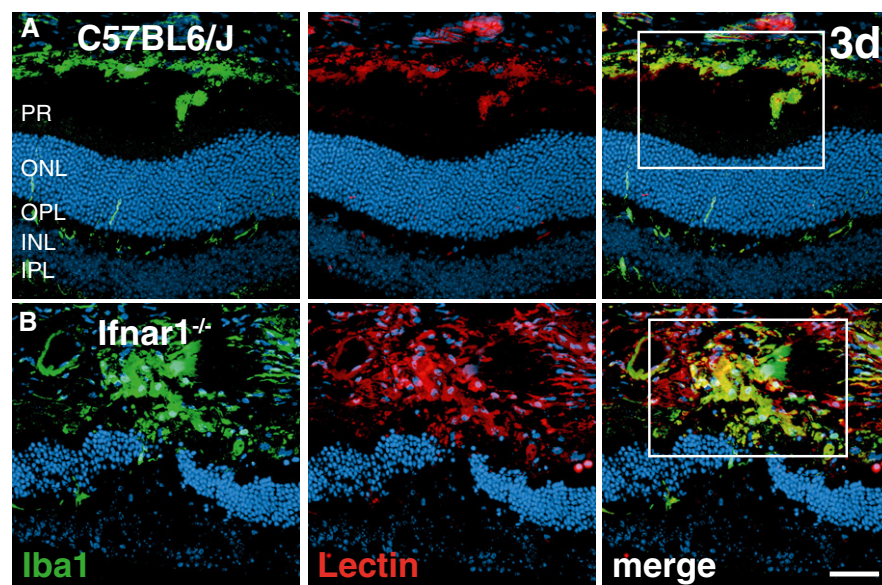

**Figure EV1. Loss of *Ifnar1* enhances CNV and leads to accumulation of mononuclear phagocytes in the subretinal space.**

A, B Representative images of Iba1 (green) and lectin (red) co-stained retinal cross sections 3 days after laser coagulation in C57BL6/J controls (A) and *Ifnar1*<sup>-/-</sup> (B) mice with nuclear staining (DAPI, blue). The white box indicates the spot where the laser hit the retina. Scale bar 50  $\mu$ m.

C, D Representative images of Iba1 (green) stained retinal flat mounts and Iba1 and lectin (red) co-stained RPE/choroidal flat mounts 7 days after laser coagulation in C57BL6/J (C) and *Ifnar1*<sup>-/-</sup> (D) mice. Scale bar 50  $\mu$ m.

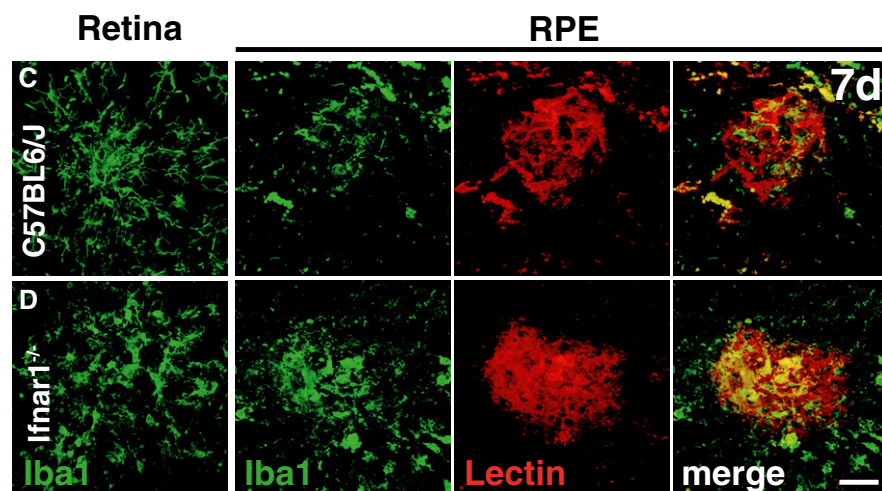

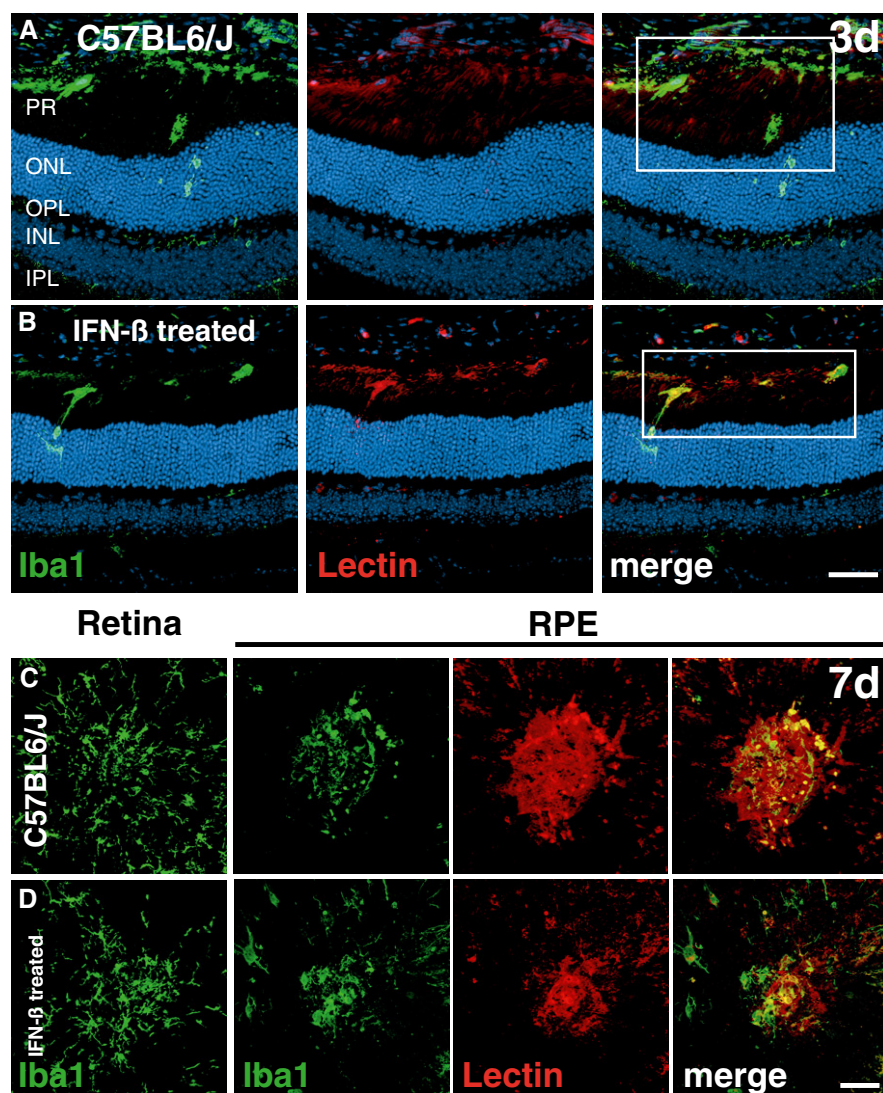

**Figure EV2. Reduced CNV and subretinal mononuclear phagocyte accumulation in IFN- $\beta$ -treated mice.**

A, B Representative images of Iba1 (green) and lectin (red) co-stained retinal cross sections 3 days after laser coagulation in C57BL6/J controls (A) and IFN- $\beta$ -treated C57BL6/J (B) mice with nuclear staining (DAPI, blue). The white box indicates the spot where the laser hit the retina. Scale bar 50  $\mu$ m.

C, D Representative images of Iba1 (green) stained retinal flat mounts and Iba1 and lectin (red) co-stained RPE/choroidal flat mounts 7 days after laser coagulation in C57BL6/J controls (C) and IFN- $\beta$ -treated C57BL6/J (D) mice. Scale bar 50  $\mu$ m.

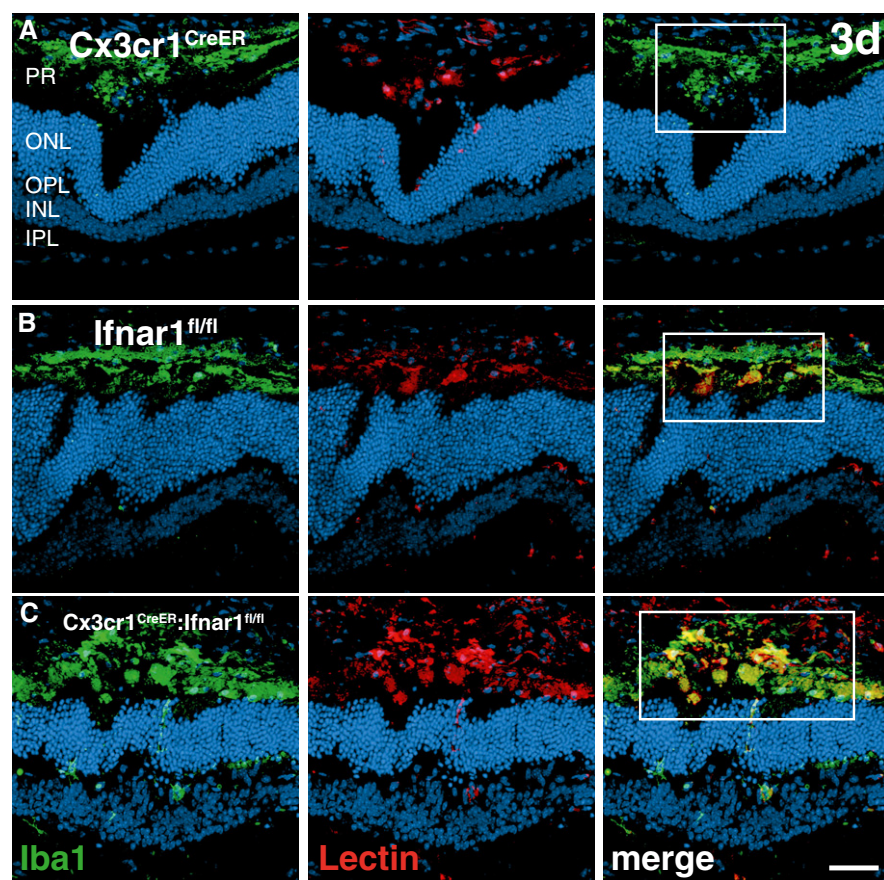

**Figure EV3. Loss of *Ifnar1* in microglia/macrophages leads to their subretinal accumulation and enhances CNV.**

A–C Representative images of Iba1 (green) and lectin (red) co-stained retinal cross sections 3 days after laser coagulation in C57BL6/J controls (A) and *Ifnar1*<sup>−/−</sup> (B) and *Cx3cr1*<sup>CreER</sup>; *Ifnar1*<sup>fl/fl</sup> (C) mice with nuclear staining (DAPI, blue). The white box indicates the spot where the laser hit the retina. Scale bar 50  $\mu$ m.

D–F Representative images of Iba1 (green) stained retinal flat mounts and Iba1 and lectin (red) co-stained RPE/choroidal flat mounts 7 days after laser coagulation in C57BL6/J controls (D) and *Ifnar1*<sup>−/−</sup> (E) and *Cx3cr1*<sup>CreER</sup>; *Ifnar1*<sup>fl/fl</sup> (F) mice. Scale bar 50  $\mu$ m.

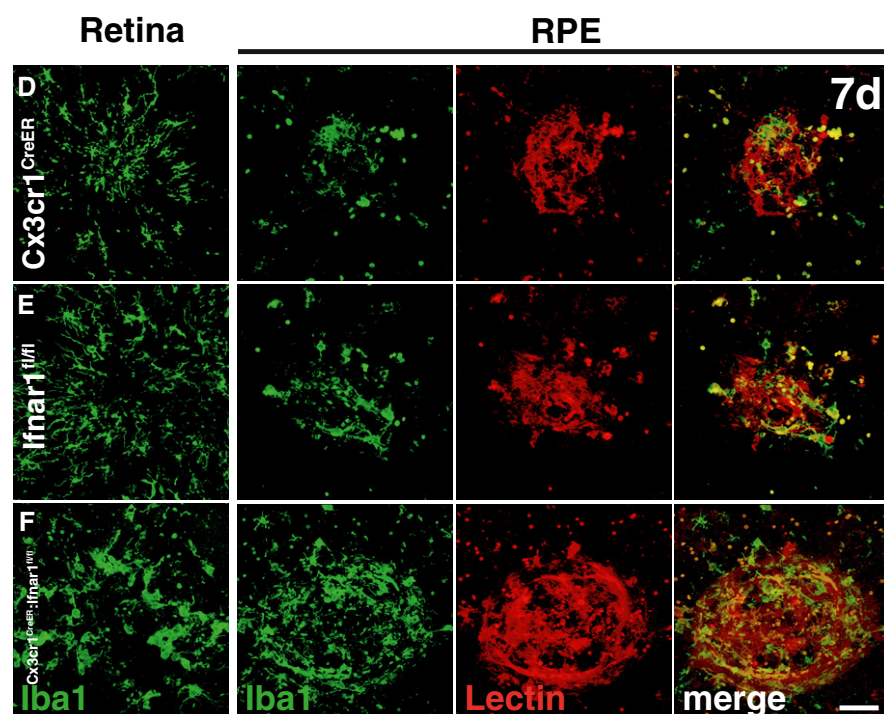

Supplement: Supplementary file 2 — Expanded View Figures PDF [file EMMM-8-670-s002.pdf]
